# Supplementary figures and images for: The LC3 recruitment mechanism is separate from Atg9L1-dependent membrane formation in the autophagic response against Salmonella
Source: PubMed Central journal article supplement — Mol Biol Cell. 2011 Jul 1;22(13):2290–300. doi: 10.1091/mbc.E10-11-0893 (PMC3128531; doi:10.1091/mbc.e10-11-0893), 2011-07-01

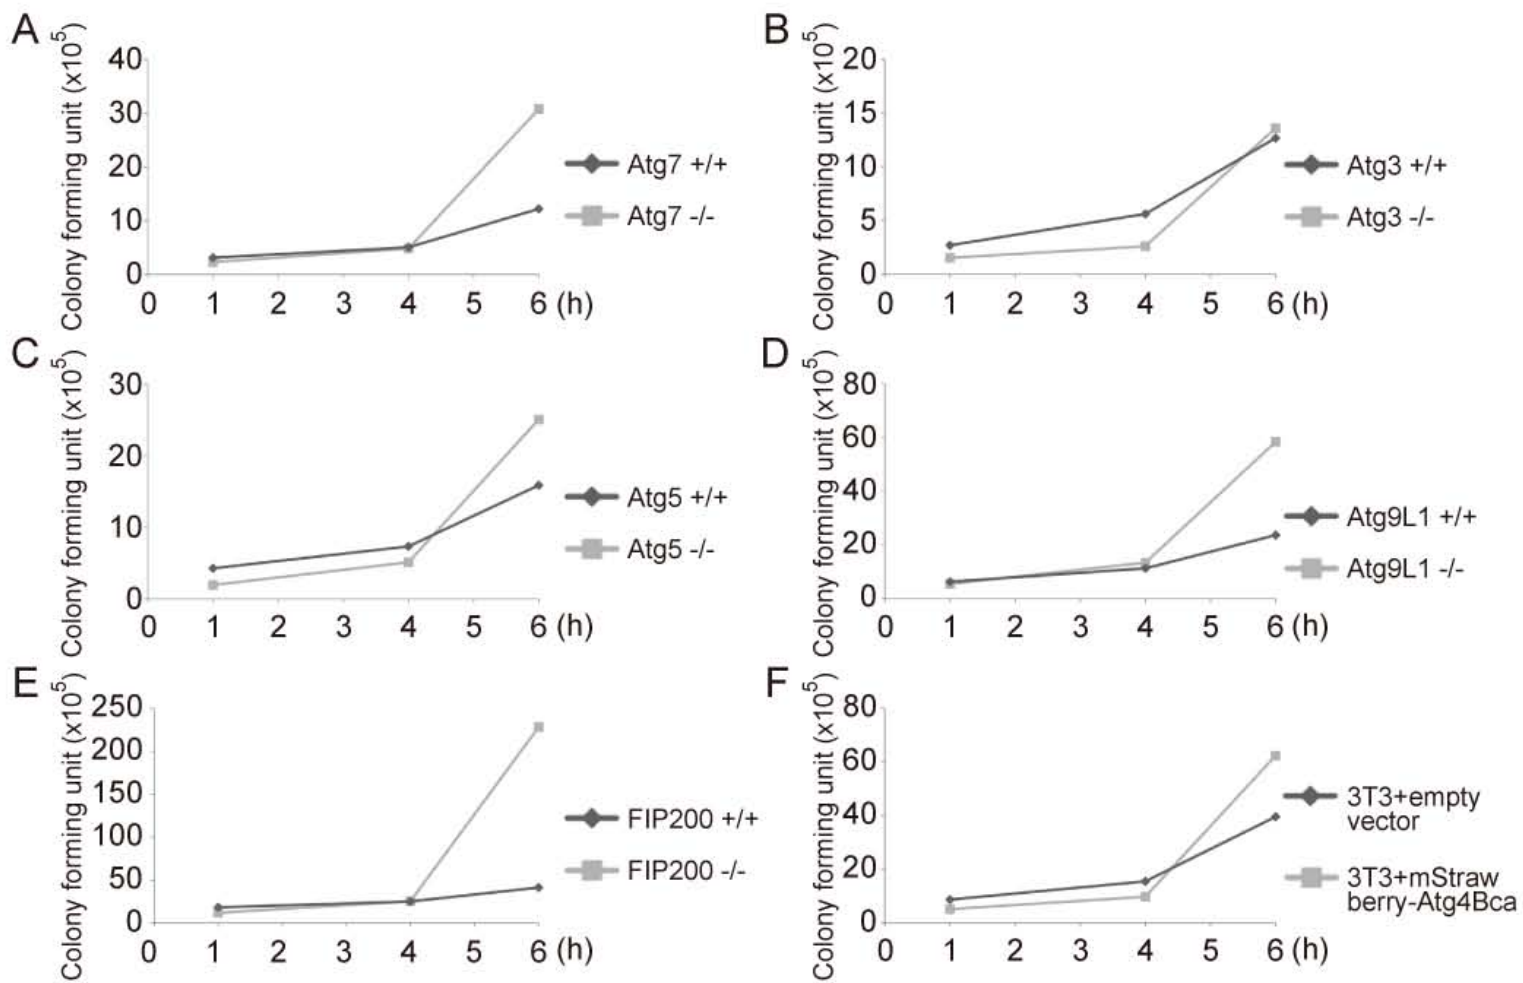

Kageyama *et al.*, Supplemental Figure 1

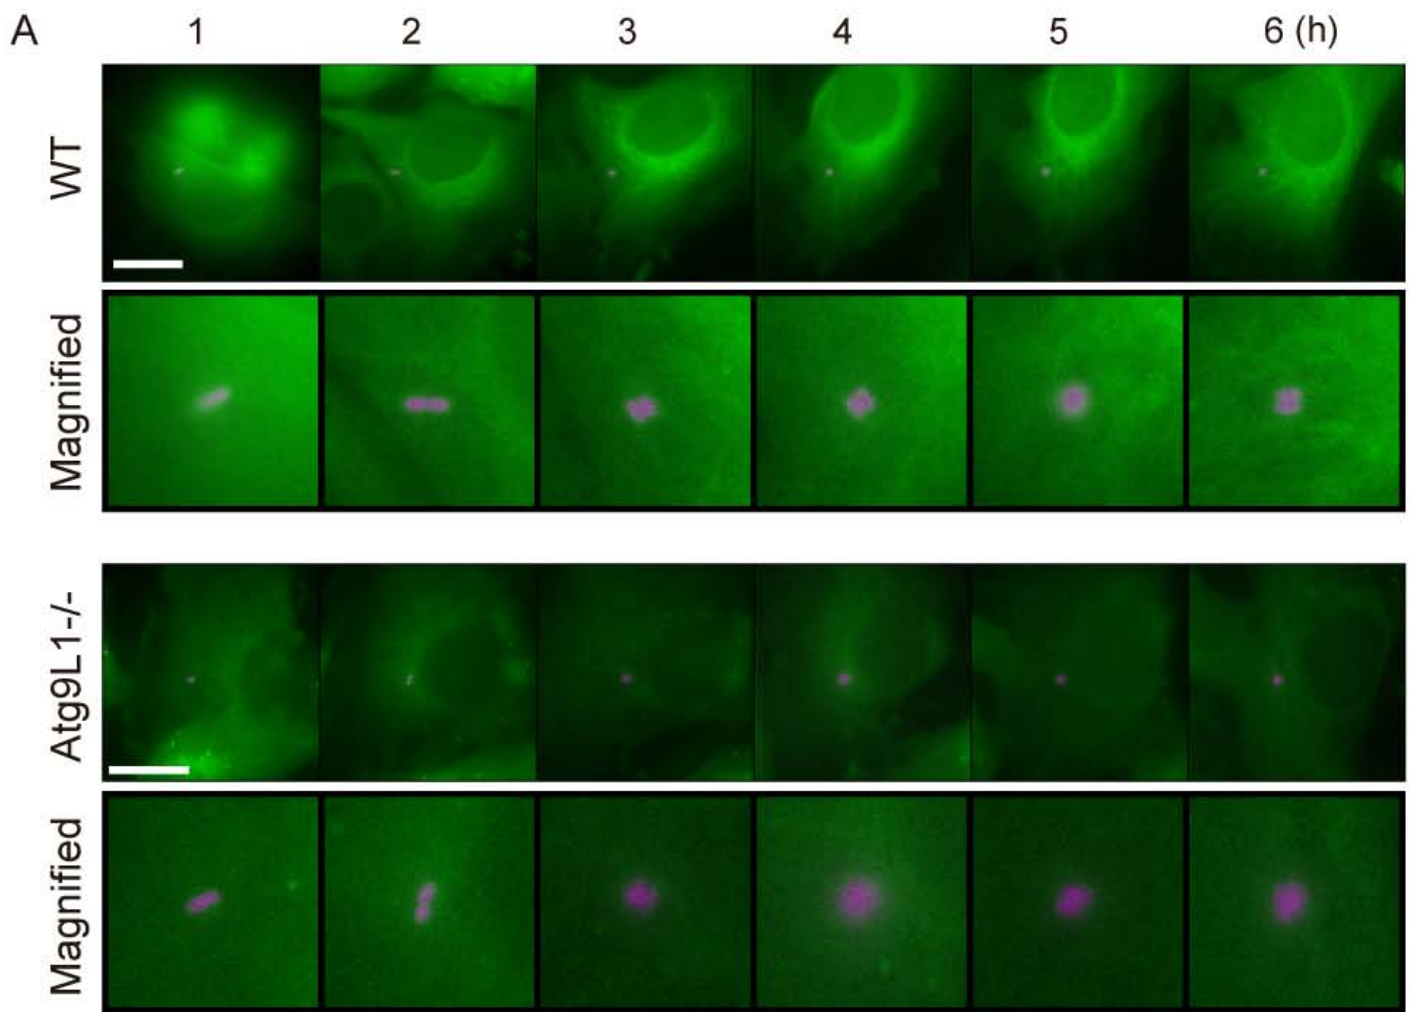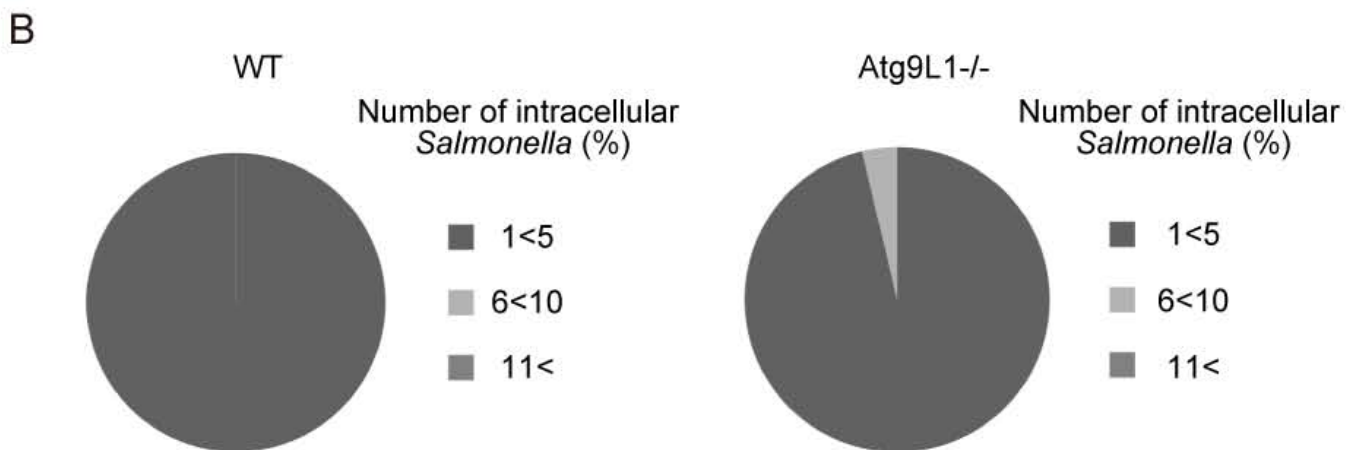

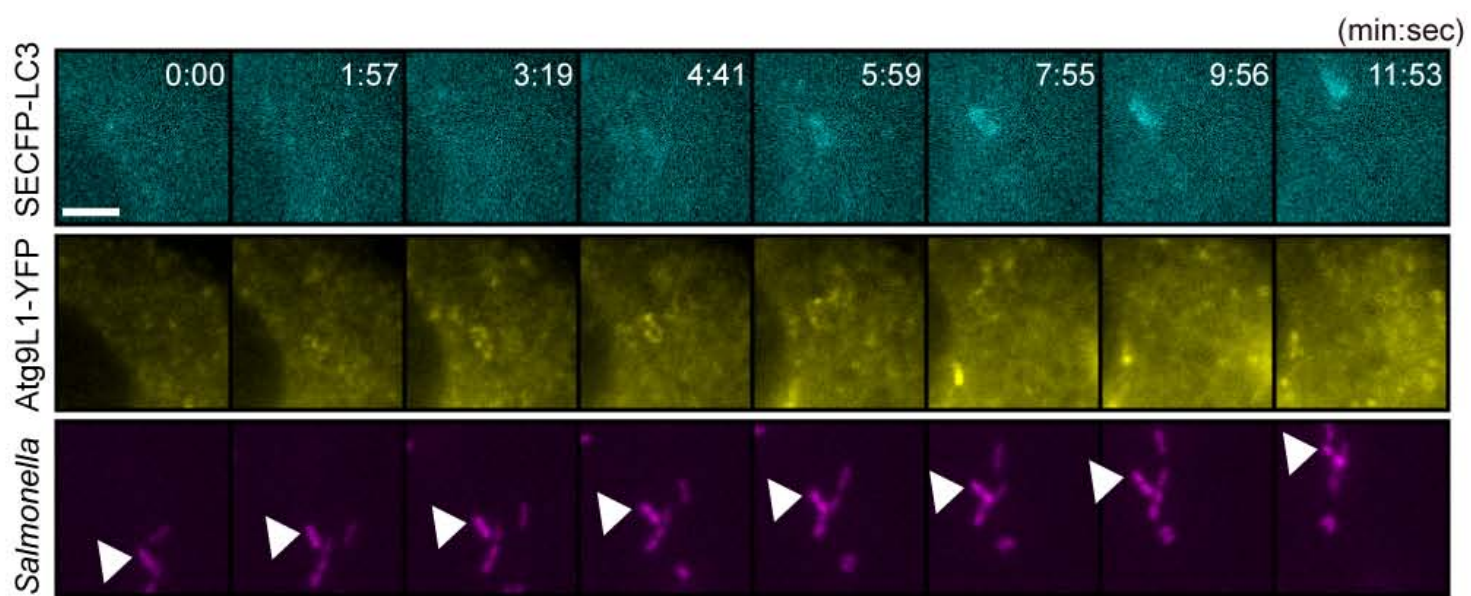

A

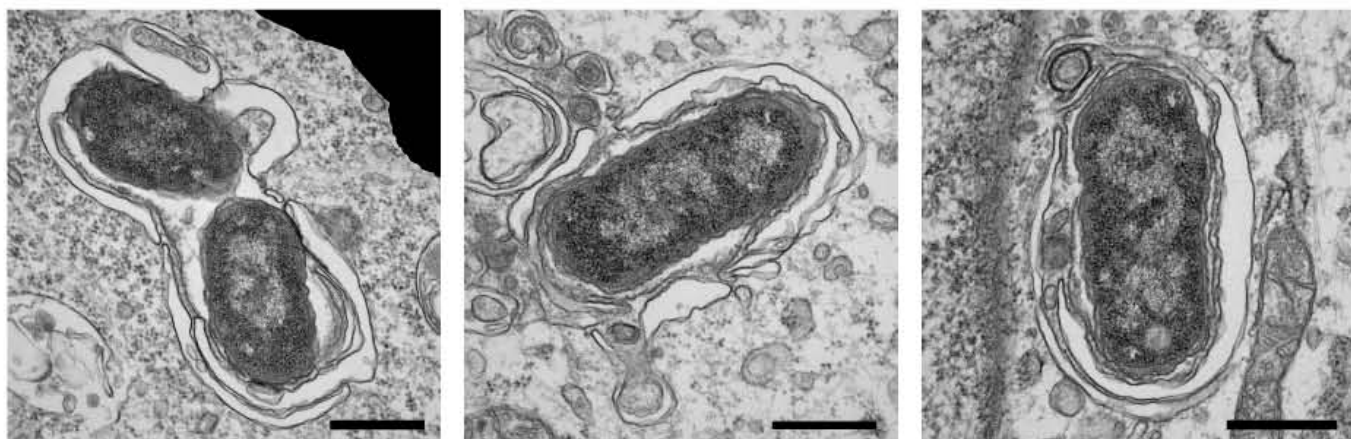

B

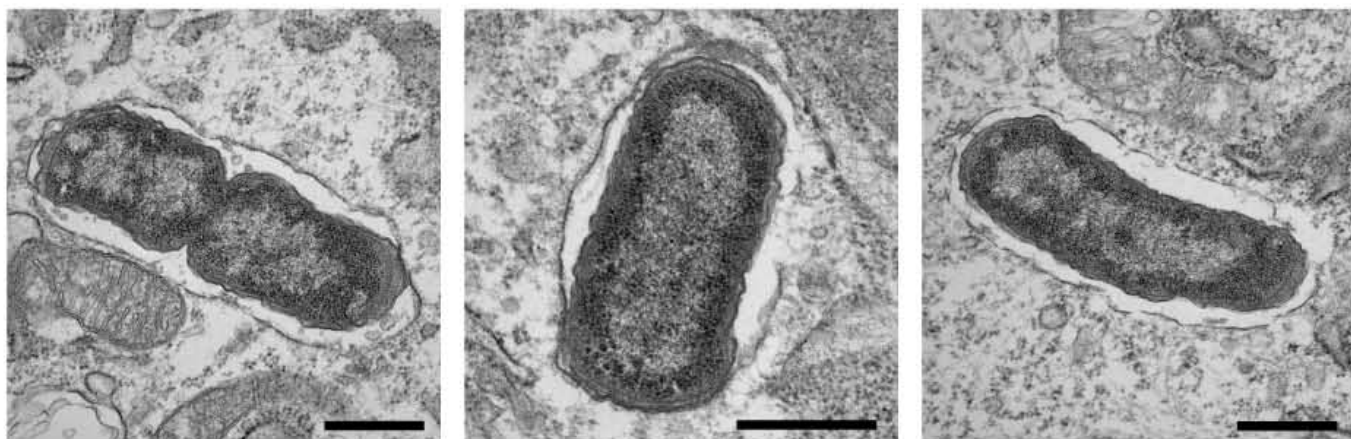

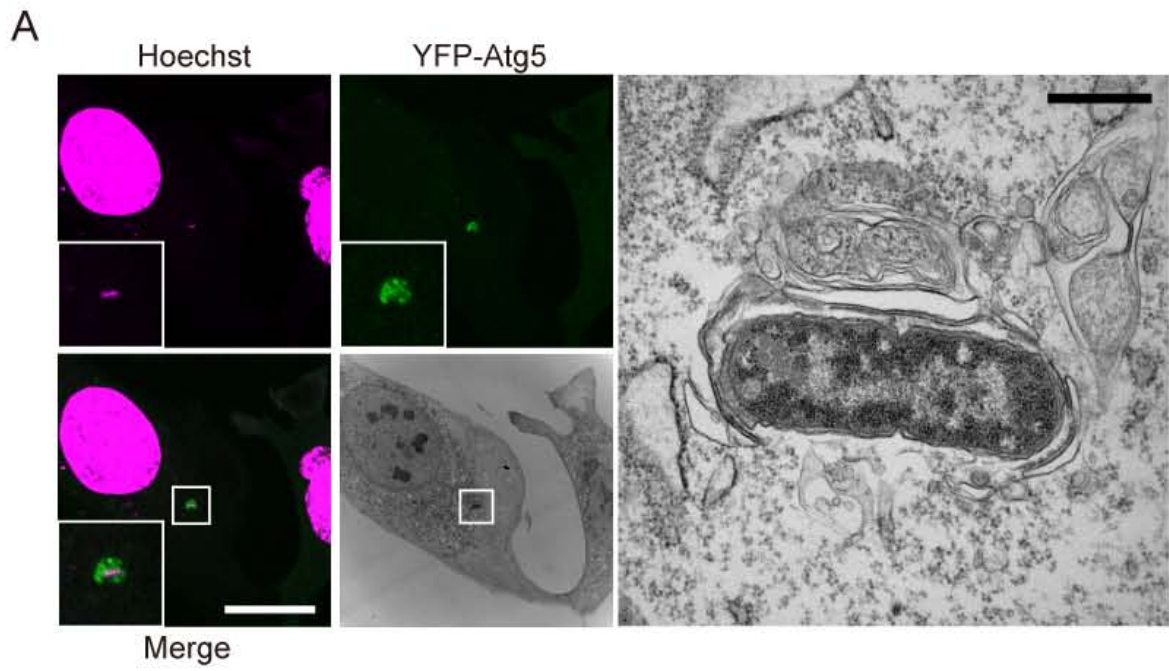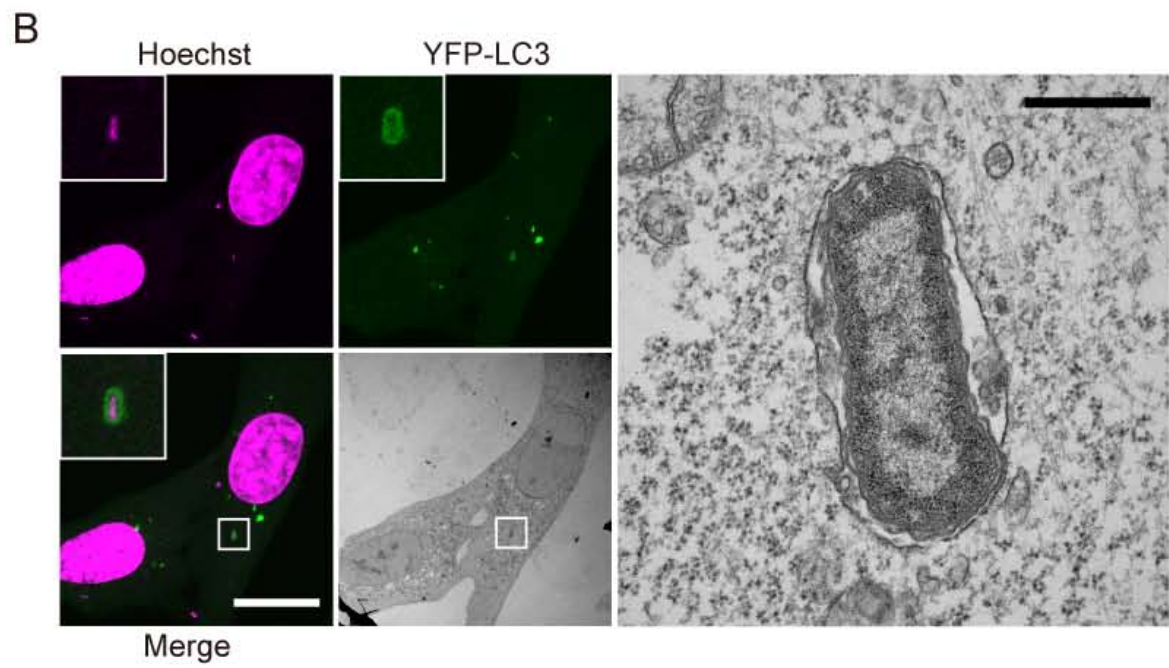

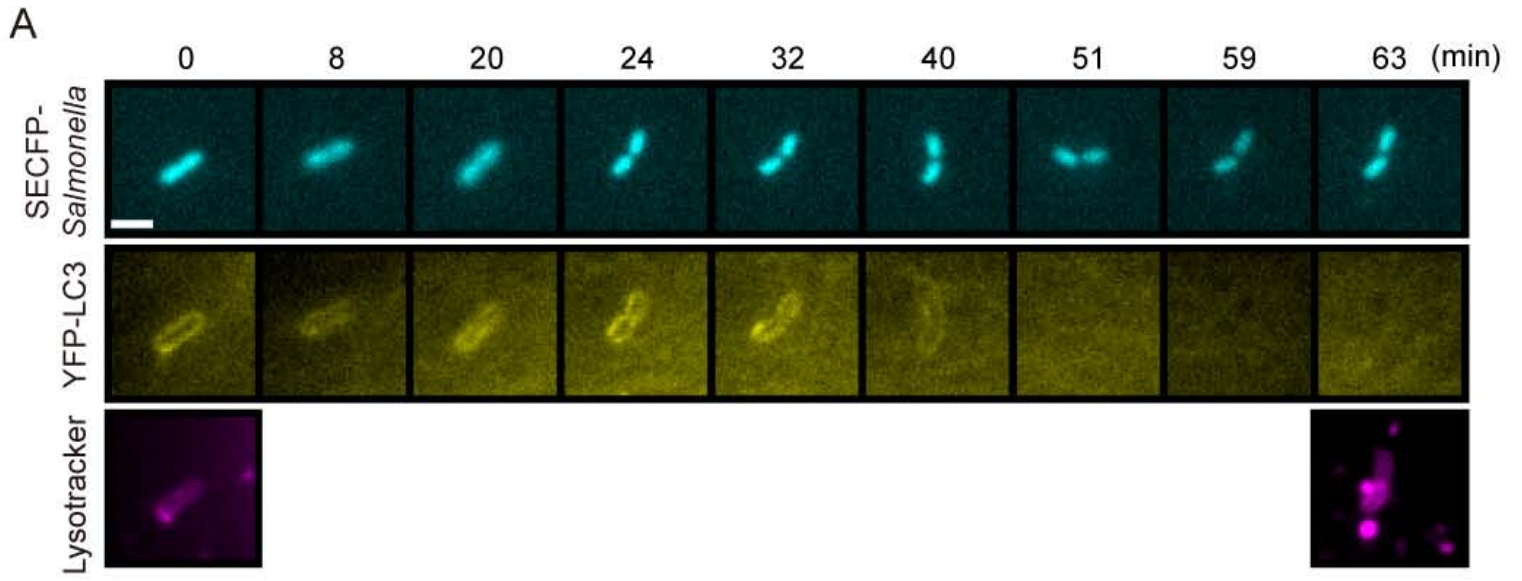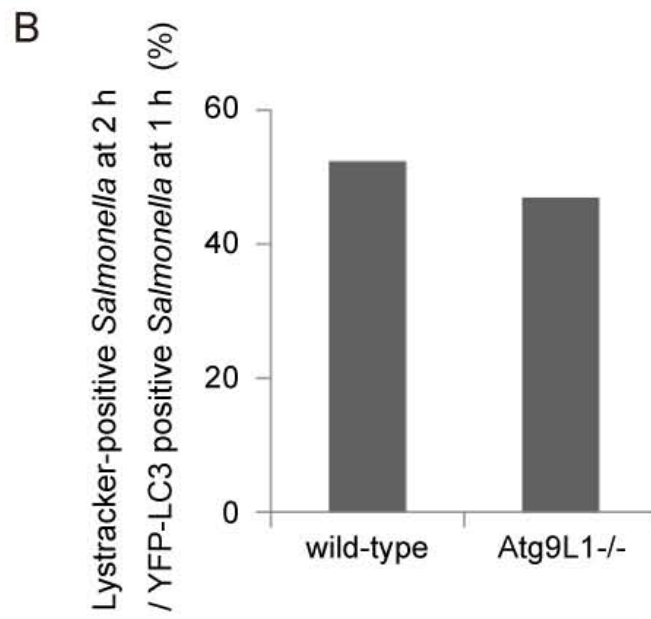

Supplement: E10-11-0893_1.pdf [file E10-11-0893_1.pdf]
